1

2 Female vocalizations predict reproductive output in Brown-headed

3 Cowbirds (*Molothrus ater*)

4

5

6 Gregory M. Kohn<sup>1,\*</sup>

7

8 New Mexico State University, Department of Biology

9

10

11 <sup>1</sup> Department of Biology, New Mexico State University, Las Cruces, New Mexico

12

13

14 \* Corresponding author

15 email: [gmkohn@nmsu.edu](mailto:gmkohn@nmsu.edu)

16

17

18

19

20

21

22

23

24 ABSTRACT:

25           Pair bonds are often maintained through the reciprocal and coordinated exchange  
26 of communicative signals. The ability to recognize and appropriately respond to a  
27 partner's signals will define a pair's ability to reproduce. Individual variation in  
28 responsiveness, by shaping the formation and maintenance of strong pair bonds, will  
29 ultimately influence an individual's reproductive output. Throughout the breeding period,  
30 female cowbirds (*Molothrus ater*) respond to male song displays using a vocalization  
31 known as the chatter. In this study, we investigated whether variation in chatters  
32 remained repeatable across years and predicted reproductive performance. A flock of  
33 cowbirds housed in a large aviary complex was observed during the spring of 2011 to  
34 2012. We recorded courtship interactions, including singing behavior for males, and  
35 chatters and eggs laid by females. The rate with which females responded to song using  
36 chatters remained consistent across years, with some females predictably responding to  
37 more songs using chatters than others. During 2012, chattering predicted the number of  
38 eggs females laid and her paired status. Paired females were more likely to respond to  
39 songs with chatters, and there was a strong positive relationship between the number of  
40 eggs laid and the proportion of songs she responded to using chatters. Overall, these  
41 findings suggest that individual variation in female vocal responsiveness is an important  
42 contributing factor to cowbird reproductive success.

43

44 Keywords: female vocalizations, reproductive success, courtship, brown-headed cowbird,  
45 social responsiveness, temperament, animal personality, individual differences

46

47 **INTRODUCTION:**

48

49           The ability to form and maintain pair bonds is a key factor in reproductive success  
50 (1-5). Successful pair bond maintenance requires pairs to coordinate activities and  
51 behavior to create strong, enduring, relationships. Within most vertebrate species,  
52 individuals possess social displays and vocalizations that attract the attention of, and  
53 coordinate activities with, potential or established mates (6). Individual differences in the  
54 use of such displays may create stronger social bonds with preferred mates, and  
55 ultimately increase reproductive output over time (7).

56

57           Increasingly, female displays and vocalizations are seen as critical factors shaping  
58 courtship and pair bonds in a wide array of species (8-11). During the breeding season,  
59 male cowbirds perform directed song displays at males and females. During song  
60 displays, males orient towards a neighboring individual and perform a song while  
61 spreading their wings and bowing (12). Cowbird courtship revolves around the female's  
62 response to these song displays, and males modulate the intensity of their visual display  
63 in order to minimize female withdrawal (13). Females communicate their mate  
64 preferences using both visual (10) and acoustic (14) responses to male song displays.  
65 During the fall, males depend on these response displays for the development of their  
66 song, with females preferentially responding to, and reinforcing, high-quality song  
67 variants (10). Nevertheless, less is known about the factors shaping variation in such  
68 female responses, and how such variation predicts later reproductive outcomes for  
69 females.

70

71           Across many species females utilize vocalizations in response to male courtship  
72 displays (e.g., red winged blackbirds, *Agelaius phoeniceus* (15), grasshopper sparrows,  
73 *Ammodramus savannarum* (16), dunnocks, *Prunella modularis* (17), and duetting species  
74 (18, 19) ). While female cowbirds do not sing, they possess an individually distinct  
75 chatter vocalization that is commonly used in response to a male's song display (20).  
76 These response chatters often overlap or directly follow the end of a directed song display.  
77 In the wild, playbacks of chatters attract attention from both males and female cowbirds  
78 (21, 22); in the lab, females who are unselective in their chatters – by responding to  
79 playbacks of many different males' song with chatters –are also less likely to maintain a  
80 pair bond (23). Females exposed to playbacks of songs followed by a playback of a  
81 response chatters also preferred those songs in contrast to females who were only  
82 exposed to playbacks of the song alone (14). These studies suggest that in cowbirds, as in  
83 many other species (24), the selective and reciprocal exchange of vocalizations across  
84 males and females plays a role in communicating mate preferences and maintaining pair  
85 bonds.

86

87           The aim of this study was to investigate whether consistent individual differences  
88 in the use of female vocalizations predict reproductive output in a semi-naturalistic flock  
89 setting. My first aim was to uncover if individual variation in female responsiveness  
90 remains repeatable, with some females consistently responding to more song display with  
91 chatters than others across two different breeding seasons. Across fall flock changes,  
92 female cowbirds exhibit consistent individual differences in the selectivity and frequency

93 of their autumn social interactions (25) and use of affiliative head-down displays (26).  
94 Juvenile females who more frequently used affiliative “head-down” displays as juveniles  
95 during the fall were also more willing to respond to song using chatters during their first  
96 breeding season. This study will expand these findings to uncover if consistent individual  
97 differences in chatters are sustained across breeding seasons during adulthood.

98

99 My second aim was to uncover whether variation in the use of female  
100 vocalization reflects their reproductive output. Both strong pair bonds (7), and increased  
101 vocal responsiveness (27) can influence egg production in birds by stimulating and  
102 maintaining female reproductive physiology. As brood parasites, cowbirds do not raise  
103 their own young, and lay eggs in host species nests. Thus, the ability to place more eggs  
104 in more nests is crucial to gaining higher reproductive success. Cowbirds are also  
105 monogamous and maintain a single pair bond throughout the breeding season. I  
106 hypothesize that female cowbirds who consistently respond more to a higher proportion  
107 of song displays with chatters will be more likely to sustain a pair bond, and also exhibit  
108 higher rates of egg production than less responsive females.

109

## 110 **Methods:**

111

## 112 **Subjects**

113 All birds were originally captured in Philadelphia County, Pennsylvania and  
114 Monroe County, Indiana and housed in aviaries in Monroe County, Indiana. All subjects

115 were *Molothrus ater ater*. Previous studies have shown no differences in song or social  
116 behavior between the Philadelphia and Indiana populations (28). For this study we used  
117 28 females including 21 adult (after second year by 2012) and 7 subadult (second year by  
118 2012) females. We also used 28 males including 24 adult males and 4 subadult males.  
119 Birds ranged in age from 2 to 13 years old with an average age of 4.9 years. All birds had  
120 been used in previous studies, and were housed in large flocks prior to the beginning of  
121 this study. Each bird was marked with uniquely colored leg bands to allow for individual  
122 recognition. All birds were provided daily with a diet of vitamin-treated water (Aquavite  
123 Nutritional Research), red and white millet, canary seed and a modified Bronx Zoo diet  
124 for blackbirds.

125

## 126 **Aviaries:**

127 I used a single aviary complex that consisted of 4 subsections each with identical  
128 dimensions (9.1 x 21.4 x 3.4 meters), one small subsection (11 x 3 x 3.4 meters), and  
129 three indoor enclosures described in detail within Smith et al. (29). The large size of the  
130 aviary provides each cowbird with significant degrees of freedom to either engage or  
131 avoid interaction with conspecifics. Each large subsection of the aviary contained a  
132 covered feeding station and water bowls. Environmental conditions were similar  
133 throughout the entire aviary with shrubs, trees and grass that allowed individuals to both  
134 forage and hide. All birds were exposed to ambient climatic conditions, wild cowbirds,  
135 and the occasional sight of predators.

136

## 137 **Data collection:**

138 **Behavioral observations:**

139           Throughout the study, a scan-sampling procedure was used to record behavioral  
140 observations; the entire flock was scanned and behaviors were recorded as they were  
141 observed (30). During scan sampling all behaviors were recorded using voice recognition  
142 technology described in detail by White, King & Duncan (31). When used in  
143 combination with voice recognition technology, scan-sampling can accurately acquire a  
144 more comprehensive dataset than focal sampling (32). All observations were conducted  
145 from 07:00-10:30 AM when cowbirds are most active, and were counterbalanced, so  
146 different observers took the same number of scan-sampling blocks in each aviary every  
147 day.

148

149           From June 9<sup>th</sup> to July 8<sup>th</sup> 2011 and from May 1<sup>st</sup> to June 8<sup>th</sup> 2012, we recorded  
150 courtship behavior, focusing on the vocal and approach behavior of both males and  
151 females. Throughout the study courtship behavior was recorded during 15-minute scan  
152 sampling blocks. For females, we recorded the number of songs each female received  
153 from males, and the number of female chatter vocalizations. Female chatter vocalizations  
154 were either response or undirected chatters. Response chatters occur when a female  
155 responds to a directed male song with chatter vocalization within a one second time  
156 window. Undirected chatter vocalizations occur when the females performs a chatter  
157 vocalization outside of singing contexts. For male courtship behavior, we recorded the  
158 number of female and male directed songs. Copulations were also recorded in order to  
159 assess female pair bonds (see below). During the pre-breeding season from March 18<sup>th</sup> to  
160 April 23<sup>rd</sup> in 2012 we also recorded approach behavior in separate 7-minute observation

161 blocks. Here an approach was scored when one individual approached another individual  
162 with any part of its body within a radius of 30cm.

163

## 164 **Egg Collection**

165 From May 1<sup>st</sup> to June 8<sup>th</sup> we recorded the number of eggs each female laid. Six  
166 decoy nests were installed in each of the 4 large subsections of the aviary complex. Each  
167 nest was mounted on a forked perch attached to a backboard that contained a video  
168 camera, and was installed on posts or bushes within the aviary. All nests were supplied  
169 with yogurt-covered raisins as decoy eggs. A decoy egg was added every day to each nest  
170 until the nest contained three decoy eggs. Each day all nests were checked for the  
171 presence of cowbird eggs laid during the morning. After 8 days in one area each nest was  
172 moved to a different location within the aviary, nesting material was replaced, and was  
173 treated as a new nest starting with no eggs. All nests were video monitored to determine  
174 the identity of laying females by using Geovision software (Geovision Inc. 2008, 9235  
175 Research Drive, Irvine, CA, USA) on Dell Vostro 230 computers running a 32-bit  
176 Windows 7 operating system. All work was conducted under ASAB/ABS guidelines and  
177 approved by the Institutional Care and Use Committee of Indiana University (08-018).

178

## 179 **Procedure**

180 *Year 1: Spring 2011:* From June 9<sup>th</sup> to July 8<sup>th</sup> three observers collected a total of  
181 240 observation blocks recording courtship behavior.

182



183            *Year 2: Spring 2012:* In the pre-breeding season from March 18<sup>th</sup> to April 23<sup>rd</sup>,  
184 three observers collected a total of 40 blocks recording approach behavior and 164 blocks  
185 recording courtship behavior. During the breeding season from May 1<sup>st</sup> to June 8<sup>th</sup>, three  
186 observers collected a total of 360 observational blocks recording courtship behavior. All  
187 decoy nest units were installed on May 1<sup>st</sup> and used to record the number of eggs laid  
188 until the end of the breeding season on June 8<sup>th</sup>.

189

## 190 **Analysis**

191            To document the repeatability of chatter across years, we used one-way intraclass  
192 correlation coefficients on the rate of each female's chatters per block across 2011 and  
193 2012. Intraclass correlation coefficients estimate the proportion of behavioral variance  
194 that is due to differences between individuals. To assess the rank ordered consistency in  
195 the individual tendency to chatter, we used Spearman's correlations on the rate of  
196 response chatter across 2011 and 2012. All further analysis was conducted on the data  
197 recorded during spring 2012.

198

199            We considered a female to be paired if she received at least 100 songs and 70% of  
200 the songs she received came from a single male, with whom she exclusively copulated  
201 from 1 May to 8 June 2012. Furthermore, this female also had to be within the top two  
202 highest-ranking females sung to by the male. Thus, paired females maintained a selective  
203 relationship with a single male throughout the length of the breeding season, whereas  
204 unpaired females did not. We used Mann Whitney U-tests to look at the differences in the

205 proportion of songs that a female responded to with a chatter, and the number of songs a  
206 female received between paired and unpaired females.

207

208 We used permutation-based linear models to investigate how variation in spring  
209 behavior predicted a female's reproductive output. As social behavior often does not  
210 meet the assumption that errors are independent and normally distributed, permutation  
211 methods offer ideal alternatives to calculate probabilities of getting observed statistics  
212 after random reshuffling the data (33). For this study we used the `lmp` function in the  
213 `lmPerm` R package (34). I performed two models in this study: one model for all females,  
214 and another model restricted to paired females. Each model used an exact method to  
215 produce permutation probabilities and ran a minimum of 5000 permutations. As some  
216 explanatory factors were inter-correlated, we used variance inflation factors to assess the  
217 multicollinearity of main effects. A variance inflation factor greater than 10 is used to  
218 indicate potential multicollinearity, which makes model interpretation difficult (35). In  
219 none of our presented models did the VIFs for any main effects exceed 1.5. Post hoc  
220 analysis was conducted using Spearman's correlations on continuous explanatory factors,  
221 and Wilcoxon rank sum test for categorical explanatory factors. Confidence intervals for  
222 Spearman's coefficients were calculated using resampling techniques.

223

224 For both models, the dependent factor was the number of eggs that each female  
225 laid. For the all-female model, the explanatory factors included main effects of the total  
226 rate of songs received, paired status, the number of approaches initiated during the pre-  
227 breeding season, proportion chatter (number of response chatters/ total number of songs),

228 and their age class (sub-adult and adult) and the number of undirected chatters. The  
229 paired-female model was restricted to only females in a pair bond, and focused on how  
230 interactions in pairs predicted female reproductive output. The explanatory factors for the  
231 paired model were the rate of songs received from their paired male, the proportion  
232 chatter in response to their paired male, the female's age class (sub-adult and adult),  
233 whether they were paired with the same or different male across years (same pair,  
234 different pair), and the number of undirected chatters.

235

## 236 **Results**

237

### 238 **Repeatability of chatters across years**

239 Across years, females were predictable in their propensity to respond to song  
240 displays using chatters. In 2011, we observed a total of 4,152 chatters including 1,272  
241 response chatters (*Median per individual* = 28.5) and 2,880 undirected chatters (*Median*  
242 *per individual* = 28). During the breeding season in 2012, we observed a total of 6,830  
243 chatters, including 2,339 response chatters (*Median per individual* = 27), and 4,491  
244 undirected chatters (*Median per individual* = 36). For all females, individual variation in  
245 the rate of response chatters was repeatable across both years ( $ICC = 0.50, p < 0.0001,$   
246  $95\% \text{ CI} = 0.17- 0.73$ ). Females also showed significant rank-ordered consistency in the  
247 rate of response chatter in relation to other females across years (Spearman's rank  
248 correlation:  $\rho = 0.43, N = 28, p = 0.03, 95\% \text{ CI} = 0.06 - 0.73$ ). Within both spring 2011  
249 and 2012, females who performed the most undirected chatters also performed the most

250 response chatters (2011:  $\rho = 0.90$ ,  $N = 28$ ,  $p < 0.0001$ , 95% CI = 0.80 – 0.94, 2012:  $\rho$   
251 = 0.93,  $N = 28$ ,  $p < 0.0001$ , 95% CI = 0.85 – 0.97).

252

## 253 **Chatters and pair bonds**

254

255 Response chatters were used very selectively, and were primarily directed  
256 towards a single male across the breeding season. From 1 May to 8 June in 2012, we  
257 recorded 5,091 songs sung to females, with a median of 177.5 songs per female. For each  
258 female, we rank ordered the number of response chatters to each male and calculated the  
259 proportion of response chatters in response to each male's songs. The top male accounted  
260 for the majority of the female's response chatters (*Median proportion of response chatter*  
261 *to top male* = 0.90), and in paired females the top male was always the female's partner.  
262 While paired females received more songs than unpaired females (*Median Paired*  
263 *Females* = 242, *Median Unpaired females* = 62, Mann-Whitney  $U$  test:  $U = 44.5$ ,  $N_1 = 14$ ,  
264  $N_2 = 14$ ,  $p = 0.0003$ ), they were also more likely to respond to a higher proportion of  
265 songs with response chatters (*Median Paired Females* = 0.60, *Median Unpaired females*  
266 = 0.05,  $U = 14$ ,  $N_1 = 14$ ,  $N_2 = 14$ ,  $p = 0.0001$ , Fig 1).

267

## 268 **Egg output All-Female Model**

269

270 During the breeding season, females who laid more eggs responded to a higher  
271 proportion of songs with a response chatter. We identified the laying female for 93 eggs  
272 (*Mean eggs laid* = 3.32). Our model (Table1) explained 74% of the variance in eggs laid

273 ( $R^2= 0.74$ ,  $F_{(7,20)} = 8.12$ ,  $p = 0.0001$ ). The proportion of male song displays followed by  
274 a chatter was the only significant predictor of the number of eggs an individual laid  
275 (Table 1). Post hoc correlations revealed a significant positive relationship between the  
276 numbers of eggs an individual laid and proportion chatter ( $\rho = 0.77$ ,  $N = 28$ ,  $p <$   
277  $0.0001$ ,  $95\%$  CI =  $0.54 - 0.92$ , Fig 2). Additional analysis also showed that the rate of  
278 response chatters before the breeding season (before females were actively laying eggs),  
279 from 18 March to 23 April, was also positively correlated with the later number of eggs  
280 an individual laid ( $\rho = 0.68$ ,  $N = 28$ ,  $p < 0.002$ ,  $95\%$  CI =  $0.43 - 0.84$ ).

281

282 We identified 72 eggs from adult females ( $Mean = 3.42$ ) and 21 eggs from sub-  
283 adult females ( $Mean = 3$ ). Age did not significantly influence the number of eggs  
284 produced. There was no significant difference in the number of eggs produced by sub-  
285 adults in contrast to adults ( $Median Adult = 2.00$ ,  $Median Subadult = 0.05$ ,  $N_1 = 21$ ,  $N_2 =$   
286  $7$ ,  $U = 88$ ,  $p = 0.45$ ). While paired status did not reach significance in our model, post hoc  
287 analysis revealed that paired females produced more eggs than unpaired females ( $Median$   
288  $Paired = 3.00$ ,  $Median Unpaired = 0.05$ ,  $U = 145$ ,  $N_1 = 14$ ,  $N_2 = 14$ ,  $P = 0.03$ ).

289

## 290 **Egg output Paired-Female model:**

291

292 Our paired-female model explained 78% of the variance in egg laying ( $R^2= 0.78$ ,  
293  $F_{(5,8)} = 5.683$ ,  $p = 0.016$ ) and had only one significant predictor, the proportion of songs  
294 followed by a response chatter (Table 1). None of the other variables were significant  
295 predictors of the number of eggs a female laid (Table 1). Within paired individuals, the

296 proportion of response chatters was significantly correlated with the number of eggs laid  
297 ( $\rho = 0.72$ ,  $p = 0.004$ , 95% CI = 0.33 – 0.92, Fig 2), but neither the number of  
298 undirected chatters ( $\rho = 0.42$ ,  $p = 0.13$ , 95% CI = -0.10 – 0.83), nor the number of  
299 songs they received from their paired male ( $\rho = -0.03$ ,  $p = 0.92$ , 95% CI = -0.55 – 0.48).

300

301 In order to look at the factors predicting variation in response chatters I conducted  
302 an additional permutation based linear model. The dependent variable in this model was  
303 the proportion of response chatters to her paired males songs. The explanatory factors  
304 were age, songs received from paired males, and if the female maintained a stable pair  
305 bond across breeding seasons. This model was not significant ( $R^2 = 0.22$ ,  $F_{(3,10)} = 0.93$ ,  $p$   
306 = 0.46). The number of songs a female received from her paired male was not  
307 significantly correlated with proportion of response chatters ( $\rho = 0.37$ ,  $N = 14$ ,  $p = 0.19$ ,  
308 95% CI = -0.06 – 0.68). There was also no significant differences in both the proportion  
309 of response chatters ( $W = 28$ ,  $p = 0.662$ ), the number of eggs laid ( $W = 33.5$ ,  $p = 0.24$ )  
310 between females who were paired with the same male across both breeding seasons, and  
311 females who changed males.

312

## 313 **Discussion:**

314

315 I investigated the association between individual differences in courtship behavior  
316 and reproductive performance in female brown-headed cowbirds. Female cowbirds  
317 exhibited consistent individual differences in their responsiveness to male song, with  
318 some females being more likely to respond to male song displays using chatters than

319 others. As vocal stimuli are important for attracting potential partners (36), shaping  
320 reproductive physiology (37, 38), and maintaining pair bonds (15, 39), consistency in  
321 vocal responsiveness may reliably construct the social relationships needed for increased  
322 reproductive output. In accordance with this, I discovered that the proportion of song  
323 displays a female responded to with chatters was greater in paired females, and predicted  
324 the number of eggs she produced. In paired females, I also found that the proportion of  
325 response chatters to their paired male's song display was the only significant predictor of  
326 the number of eggs she laid.

327

328 Paired females responded to a higher proportion of songs with chatters than  
329 unpaired females. This suggests that the maintenance of pair bonds is associated with the  
330 reciprocal exchange of vocal displays from both male and female cowbirds. While  
331 recognition of female courtship displays is becoming more widespread (40, 41), little is  
332 currently known about how these displays shape their relationship with males. Previous  
333 studies have shown have shown that increased attention, coordination, and synchrony  
334 within pairs has multiple benefits, such as increasing vigilance, lowering the energetic  
335 demands of foraging and parental care, and more effective mate guarding (42-44). In  
336 alpine accentors (*Prunella collaris*) females use complex songs to attract mates (36), and  
337 the calls of female whitethroats (*Sylvia communis*) both attract males and shape their  
338 courtship behavior (45). In many mammals such as brown rats, *Rattus norvegicus*, (46),  
339 grey mouse lemurs, *Microcebus murinus*, (47), and Barbary Macaques, *Macaca sylvanus*,  
340 (48), female vocalizations often reflect reproductive status, and are used to attract males.  
341 In the field, playbacks of cowbird chatters often attract males to the location of a speaker

342 (22), and males will often follow and peruse females who responded to their song with a  
343 chatter (Kohn, personal observation). By possessing a signal that reflects their  
344 reproductive status, female cowbirds who are more vocally responsive will be better able  
345 to attract preferred male attention and drive pair coordination across the breeding season.

346

347 Variation in signals used to attract and coordinate activities within pairs can have  
348 cascading influences on later survival and fitness. I found that a female's vocal response  
349 to male song displays was the strongest predictor of her reproductive output, with more  
350 vocally responsive females laying more eggs than less responsive females. Similar  
351 findings have been observed in red-winged blackbirds, where females who had a  
352 successful nest were more likely to answer male songs with a chit vocalization (39). In  
353 many species, the reciprocal displays between members of a pair can also shape  
354 reproductive physiology (27, 49). For instance, in ring doves (*Streptopelia risoria*), the  
355 presence of a preferred male song stimulates the females to use 'coo' vocalizations (50).  
356 In turn, the coo vocalizations themselves stimulate ovarian development (27, 49), which  
357 may result in increased egg production. Thus, the contingent displays females use in  
358 response to their partners may be an important, albeit under-recognized, component in  
359 shaping a pair's reproductive success.

360

361 Currently, the direction of effects between increased reproductive output and  
362 coordinated displays between cowbird pairs is unknown. However, females begin  
363 responding to male song with chatters prior to the egg laying period, and response chatter  
364 rates during this pre-laying period are correlated with egg output the same year. Thus, a



365 female's own courtship behavior might play a role in providing the necessary stimulation  
366 for increased reproductive output. While the mechanisms underlying the relationship  
367 between vocal responsiveness, pair bonds, and egg production need further investigation,  
368 my results demonstrate that repeated use of response chatters is predictive of increased  
369 reproductive output in female cowbirds.

370

371 In cowbirds, female responses to male vocalizations are commonly used to assess  
372 the quality and attractiveness of male signals (10). Females use their response chatter  
373 selectively, almost exclusively in response to their paired males. As females exclusively  
374 copulated with their paired males, response chatters may be a reliable signal of female  
375 preferences, and used to reinforce pair bonds. Chatters are also individually distinct (20),  
376 and their selective use may facilitate the individual identification needed to sustain a  
377 monogamous pair bond (15, 51). Female cowbirds with lesions to their HVC area are not  
378 selective in their response chatters, and chatter in response to nearly all song playbacks,  
379 regardless of their quality (23). These lesioned females are also unable to sustain a pair  
380 bond, and are courted by a larger number of males than other females. I found that  
381 females who retained the same pair-bonded males across two different breeding seasons  
382 showed no significant differences in vocal responsiveness or egg production when  
383 compared to females who changed paired males. The number of songs a female received  
384 from males did not reflect the proportion of response chatters to his songs, and further  
385 analysis also showed that the number of response chatters a male received across  
386 breeding seasons was not correlated or repeatable (Sup 1). While the correlational nature  
387 of this study does not allow us to directly test how differences in male quality or song can

388 influence female vocal responses, our result suggest that variation in the use of chatters  
389 represents different behavioral strategies that females use when engaging and forming  
390 pair bonds with preferred males.

391

392 This paper adds to the increasing number of studies showing the importance of  
393 female vocalizations in constructing and reinforcing avian pair bonds (52, 53), and  
394 further suggests that female vocalizations contributes to their reproductive success.

395 Consistent individual differences in cowbird social behavior can predict an individual's  
396 reproductive performance across long timescales (54). Juvenile female cowbirds who  
397 initiate more affiliative head-down displays during autumn are more likely to engage  
398 males with chatters and form a pair bond during their first breeding season (26). Here we  
399 show that such variation in female vocal responses is maintained into adulthood, remains  
400 associated with pair-bond status, and predicts reproductive output. In cowbirds, social  
401 experiences are critical in the development female mate preferences (55, 56), and may  
402 also shape behavioral differences in how females interact with preferred males (26).

403 Further research will explore how the early social environment shapes the development  
404 of individual differences in chatter vocalizations among females, and the causal  
405 mechanisms linking chatter vocalizations, pair bonds, and increased reproductive output.

406

407 ACKNOWLEDGEMENTS:

408 All work was conducted under ABS guidelines and approved by the Institutional Care  
409 and Use Committee of Indiana University (08-018). I would like to thank Meredith West  
410 and Andrew King for their support and advice during this project.

411

412 REFERENCES:

413

- 414 1. Spoon TR, Millam JR, Owings DH. The importance of mate behavioural  
415 compatibility in parenting and reproductive success by cockatiels, *Nymphicus*  
416 *hollandicus*. *Animal Behaviour*. 2006;71(2):315-26.
- 417 2. Fowler GS. Stages of age-related reproductive success in birds: simultaneous  
418 effects of age, pair-bond duration and reproductive experience. *American zoologist*.  
419 1995;35(4):318-28.
- 420 3. Bradley J, Wooller R, Skira I. The relationship of pair-bond formation and  
421 duration to reproductive success in short-tailed shearwaters *Puffinus tenuirostris*. *Journal*  
422 *of Animal Ecology*. 1995:31-8.
- 423 4. Bradley J, Wooller R, Skira I, Serventy D. The influence of mate retention and  
424 divorce upon reproductive success in short-tailed shearwaters *Puffinus tenuirostris*. *The*  
425 *Journal of Animal Ecology*. 1990:487-96.
- 426 5. Avital E, Jablonka E. *Animal traditions: Behavioural inheritance in evolution*:  
427 Cambridge University Press; 2000.
- 428 6. Wickler W. Vocal dueting and the pair bond. I. Coyness and partner commitment.  
429 *Zeitschrift für Tierpsychologie*. 1980;52:201-9.
- 430 7. Coulson JC. The influence of the pair-bond and age on the breeding biology of  
431 the Kittiwake Gull *Rissa tridactyla*. *Journal of Animal Ecology*. 1966;35:269-79.
- 432 8. Royle NJ, Pike TW. Social feedback and attractiveness in zebra finches.  
433 *Behavioral Ecology and Sociobiology*. 2010;64:2015-20.

- 434 9. Patricelli GL, Uy JAC, Walsh G, Borgia G. Male displays adjusted to female's  
435 response. *Nature*. 2002;415:279-80.
- 436 10. West MJ, King AP. Female visual displays affect the development of male song  
437 in the cowbird. *Nature*. 1988;334:244-6.
- 438 11. West MJ, King AP. Vocalizations of juvenile cowbirds (*Molothrus ater ater*)  
439 evoke copulatory responses from females. *Developmental Psychobiology*. 1988;21:543-  
440 52.
- 441 12. Friedmann H. The cowbirds: A study in the biology of social parasitism.  
442 Springfield, Ill: C. C. Thomas; 1929.
- 443 13. O'Loughlen AL, Rothstein SI. Multimodal signalling in a songbird: Male  
444 audiovisual displays vary significantly by social context in brown-headed cowbird.  
445 *Animal Behaviour*. 2010;79:1285-92.
- 446 14. Freed-Brown G, White DJ. Acoustic mate copying: female cowbirds attend to  
447 other females' vocalizations to modify their song preferences. *Proceedings of the Royal*  
448 *Society B*. 2009;276:3319-25.
- 449 15. Beletsky LD. Aggressive and pair-bond maintenance songs of female red-winged  
450 blackbirds (*Agelaius phoeniceus*). *Zeitschrift für Tierpsychologie*. 1982;62:47-54.
- 451 16. Smith RL. The songs of the grasshopper sparrow. *The Wilson Bulletin*.  
452 1959;71:141-52.
- 453 17. Langmore NE, Davies NB. Female dunnocks use vocalizations to compete for  
454 males. *Animal Behaviour*. 1997;53:881-90.
- 455 18. Hall ML. A review of hypotheses of the function of avian duetting. *Behavioral*  
456 *Ecology and Sociobiology*. 2004;55:415-30.

- 457 19. Hall ML. A review of vocal duetting in birds. *Advances in the Study of Behavior*.  
458 2009;40:67- 121.
- 459 20. Burnell K, Rothstein SI. Variation in the structure of female brown-headed  
460 cowbird vocalizations and its relation to vocal function and development. *Condor*.  
461 1994;96:703-15.
- 462 21. Dufty AM, Jr. Response of brown-headed cowbirds to simulated conspecific  
463 intruders. *Animal Behaviour*. 1982;30:1043-52.
- 464 22. Snyder-Mackler N, White DJ. The developmental ecology of acoustic reactions:  
465 approaches to song playbacks by male cowbirds change across their first year of life.  
466 *Behaviour*. 2011;148:747-64.
- 467 23. Maguire SE, Schmidt MF, White DJ. Social brains in context: Lesions targeted to  
468 the song control system in female cowbirds affect their social network. *PLOS one*.  
469 2013;8(5).
- 470 24. Wachtmeister C-A. Display in monogamous pairs: a review of empirical data and  
471 evolutionary explanations. *Animal Behaviour*. 2001;61:861-8.
- 472 25. Kohn GM, King AP, Scherschel LL, West MJ. Social niches and sex assortment:  
473 uncovering the developmental ecology of brown-headed cowbirds, *Molothrus ater*.  
474 *Animal Behaviour*. 2011;82:1015-22.
- 475 26. Kohn GM, King AP, Dohme R, Meredith GR, West MJ. Robust autumn social  
476 attributes predict spring courtship skills in juvenile female brown-headed cowbirds,  
477 *Molothrus ater*. *Animal Behaviour*. 2013.

- 478 27. Cheng M, Peng JP, Johnson P. Hypothalamic neurons preferentially respond to  
479 female nest coo stimulation: demonstration of direct acoustic stimulation of luteinizing  
480 hormone release. *Journal of Neuroscience*. 1998;18:5477-89.
- 481 28. King AP, West MJ. Variation in species-typical behavior: A contemporary theme  
482 for comparative psychology. In: Dewsbury DA, editor. *Contemporary Issues in*  
483 *Comparative Psychology*. Sunderland, Massachusetts: Sinauer; 1990. p. 331-9.
- 484 29. Smith VA, King AP, West MJ. The context of social learning in brown headed  
485 cowbirds: Association patterns in a captive flock. *Animal Behaviour*. 2002;63:23-35.
- 486 30. Martin P, Bateson PPG. *Measuring behaviour: an introductory guide*. Cambridge:  
487 Cambridge University Press; 1986.
- 488 31. White DJ, King AP, Duncan SD. Voice recognition technology as a tool for  
489 behavioral research. *Behavioral Research Methods, Instrumentation, and Computers*.  
490 2002;34:1-5.
- 491 32. White DJ, Smith VA. Testing measures of animal social association by computer  
492 simulation. *Behaviour*. 2007;144:1447-68.
- 493 33. Anderson MJ. Permutation tests for univariate or multivariate analysis of variance  
494 and regression. *Canadian journal of fisheries and aquatic sciences*. 2001;58(3):626-39.
- 495 34. Wheeler B, Torchiano M. *lmPerm: Permutation tests for linear models*. R package  
496 version. 2010;1(1.2).
- 497 35. Chatterjee S, Hadi AS, Price B. *Regression analysis by example*. 3rd ed. New  
498 York: John Wiley & Sons; 2000.

- 499 36. Langmore NE, Davies NB, Hatchwell BJ, Hartley IR. Female song attracts males  
500 in the alpine accentor, *Prunella collaris*. Proceedings of the Royal Society B.  
501 1996;263:141-6.
- 502 37. Lehrman DS. Hormonal responses to external stimuli in birds. Ibis.  
503 1959;101:478-96.
- 504 38. Oliveira RF. Social modulation of androgens in vertebrates: Mechanisms and  
505 function. Advances in the Study of Behavior. 2004;34:165-239.
- 506 39. Yasukawa K. The cost and benefits of a vocal signal: The nest-associated 'chit' of  
507 the female red-winged blackbird, *Agelaius phoeniceus*. Animal Behaviour. 1989;38:866-  
508 74.
- 509 40. Garamszegi LZ, Pavlova DZ, Eens M, Møller AP. The evolution of song in  
510 female birds in Europe. Behavioral Ecology. 2006;18:86-96.
- 511 41. Langmore NE. Functions of duet and solo songs of female birds. Trends in  
512 Ecology and Evolution. 1998;13:136-40.
- 513 42. Emery NJ, Seed AM, von Bayern AMP, Clayton NS. Cognitive adaptations of  
514 social bonding in birds. Philosophical Transactions of the Royal Society B.  
515 2007;362(1480):489-505.
- 516 43. Black JM. Fitness consequences of long-term pair bonds in barnacle geese:  
517 monogamy in the extreme. Behavioral Ecology. 2001;12(5):640-5.
- 518 44. Hannon SJ, Martin K. Monogamy in willow ptarmigan: is male vigilance  
519 important for reproductive success and survival of females? Animal Behaviour.  
520 1992;43(5):747-57.

- 521 45. Balsby T, J. S., Dabelsteen T. Female behaviour affects male courtship in  
522 whitethroats *Sylvia communis*: an interactive experiment using visual and acoustic cues.  
523 *Animal Behaviour*. 2002;63:251-7.
- 524 46. Matochik JA, White NR, Barfield RJ. Variations in scent marking and ultrasonic  
525 vocalizations by Long-Evans rats across the estrous cycle. *Physiology & Behavior*.  
526 1992;51:783 - 6.
- 527 47. Buesching CD, Heistermann M, Hodges JK, Zimmermann E. Multimodal oestrus  
528 advertisement in a small nocturnal prosimian, *Microcebus murinus*. *Folia Primatologica*.  
529 1998;69:295-308.
- 530 48. Engelhardt A, Fischer J, Neumann C, Pfeifer J-B, Heistermann M. Information  
531 content of female copulation calls in wild long-tailed macaques (*Macaca fascicularis*).  
532 *Behavioral Ecology and Sociobiology*. 2012;66:121-34.
- 533 49. Cheng M. For whom does the dove coo? A case for the role of self-stimulation.  
534 *Animal Behaviour*. 1992;43:1035-42.
- 535 50. Lott D, Lehrman DS. Exteroceptive stimulation of the reproductive system of the  
536 female ring dove (*Streptopelia risoria*) by the mate and by the colony milieu. *Animal*  
537 *Behaviour*. 1967;15:433-7.
- 538 51. Smith WJ. Animal duets: forcing a mate to be attentive. *Journal of Theoretical*  
539 *Biology*. 1994;166:221-3.
- 540 52. Elie JE, Mariette MM, Soula HA, Griffith SC, Mathevon N, Vignal C. Vocal  
541 communication at the nest between mates in wild zebra finches: a private vocal duet?  
542 *Animal Behaviour*. 2010;80:597-605.



543 53. Amy M, Salvin P, Naguib M, Leboucher G. Female signalling to male song in the  
544 domestic canary, *Serinus canaria*. Royal Society open science. 2015;2(1):140196.

545 54. Kohn GM, King AP, Dohme R, Meredith GR, West MJ. In the company of  
546 cowbirds, *Molothrus ater ater*: Robust patterns of sociability predict reproductive  
547 performance. Journal of Comparative Psychology. 2012.

548 55. West MJ, King AP, White DJ, Gros-Louis J, Freed-Brown G. The development of  
549 local song preferences in female cowbirds (*Molothrus ater*): Flock living stimulates  
550 learning. Ethology. 2006;112:1095-107.

551 56. Freeberg TM, Duncan SD, Kast TL, Enstrom DA. Cultural influences on female  
552 mate choice: an experimental test in cowbirds, *Molothrus ater*. Animal Behaviour.  
553 1999;57:421-6.

554

555

556

557

558

559

560

561

562

563

564

565

566 Figure 1:

567  [[[ Figure 1 ]]]

568

569 **Figure 1** The proportion of response chatter vocalizations based on based on an  
570 individual's paired status. Boxes represent interquartile ranges with the median in the  
571 middle represented by a bold line; whiskers represent the range of the highest and lowest  
572 values that are within a range of 1.5 times the interquartile range; dots indicate data  
573 points that are outside this range.

574

575

576

577

578

579 Figure 2.

580

581

582  [[[ Figure 2 ]]]

583

584 **Fig 2:** Scatterplots for the proportion of response chatters and the number of eggs laid  
585 for all females. Females who formed a pair bond during 2012 season are shown as a  
586 triangle, and females who did not maintain a pair bond are shown as a circle. Line  
587 represents the permuted linear regression with surrounding 95% confidence intervals.

588

589 Table 1.

| A. All- Female Model      | Coefficients | P value        | A. Paired- Female Model     | Coefficients | P value   |
|---------------------------|--------------|----------------|-----------------------------|--------------|-----------|
| <b>Songs Received</b>     | -0.01        | p = 0.08       | Paired male song            | -0.02        | p = 0.16  |
| <b>Approach</b>           | 0.005        | p = 0.41       | Approach                    | 0.002        | p = 0.86  |
| <b>Proportion chatter</b> | 14.65        | p < 0.00001*** | Proportion paired chatter   | 12.47        | p = 0.03* |
| <b>Age class</b>          | 0.95         | p = 0.50       | Age Class                   | 4.97         | p = 0.11  |
| <b>Undirected chatter</b> | 0.58         | p = 0.69       | Undirected Chatter          | 2.27         | p = 0.24  |
| <b>Pair bond</b>          | 1.28         | p = 0.38       | Stable/ Switched pair bonds | 2.69         | p = 0.20  |

590

591 Table 1: Results of the permutation-based linear models for eggs laid during the breeding

592 season of 2017. Table represents the model for (A) all-females and (B) paired-females.

593

594

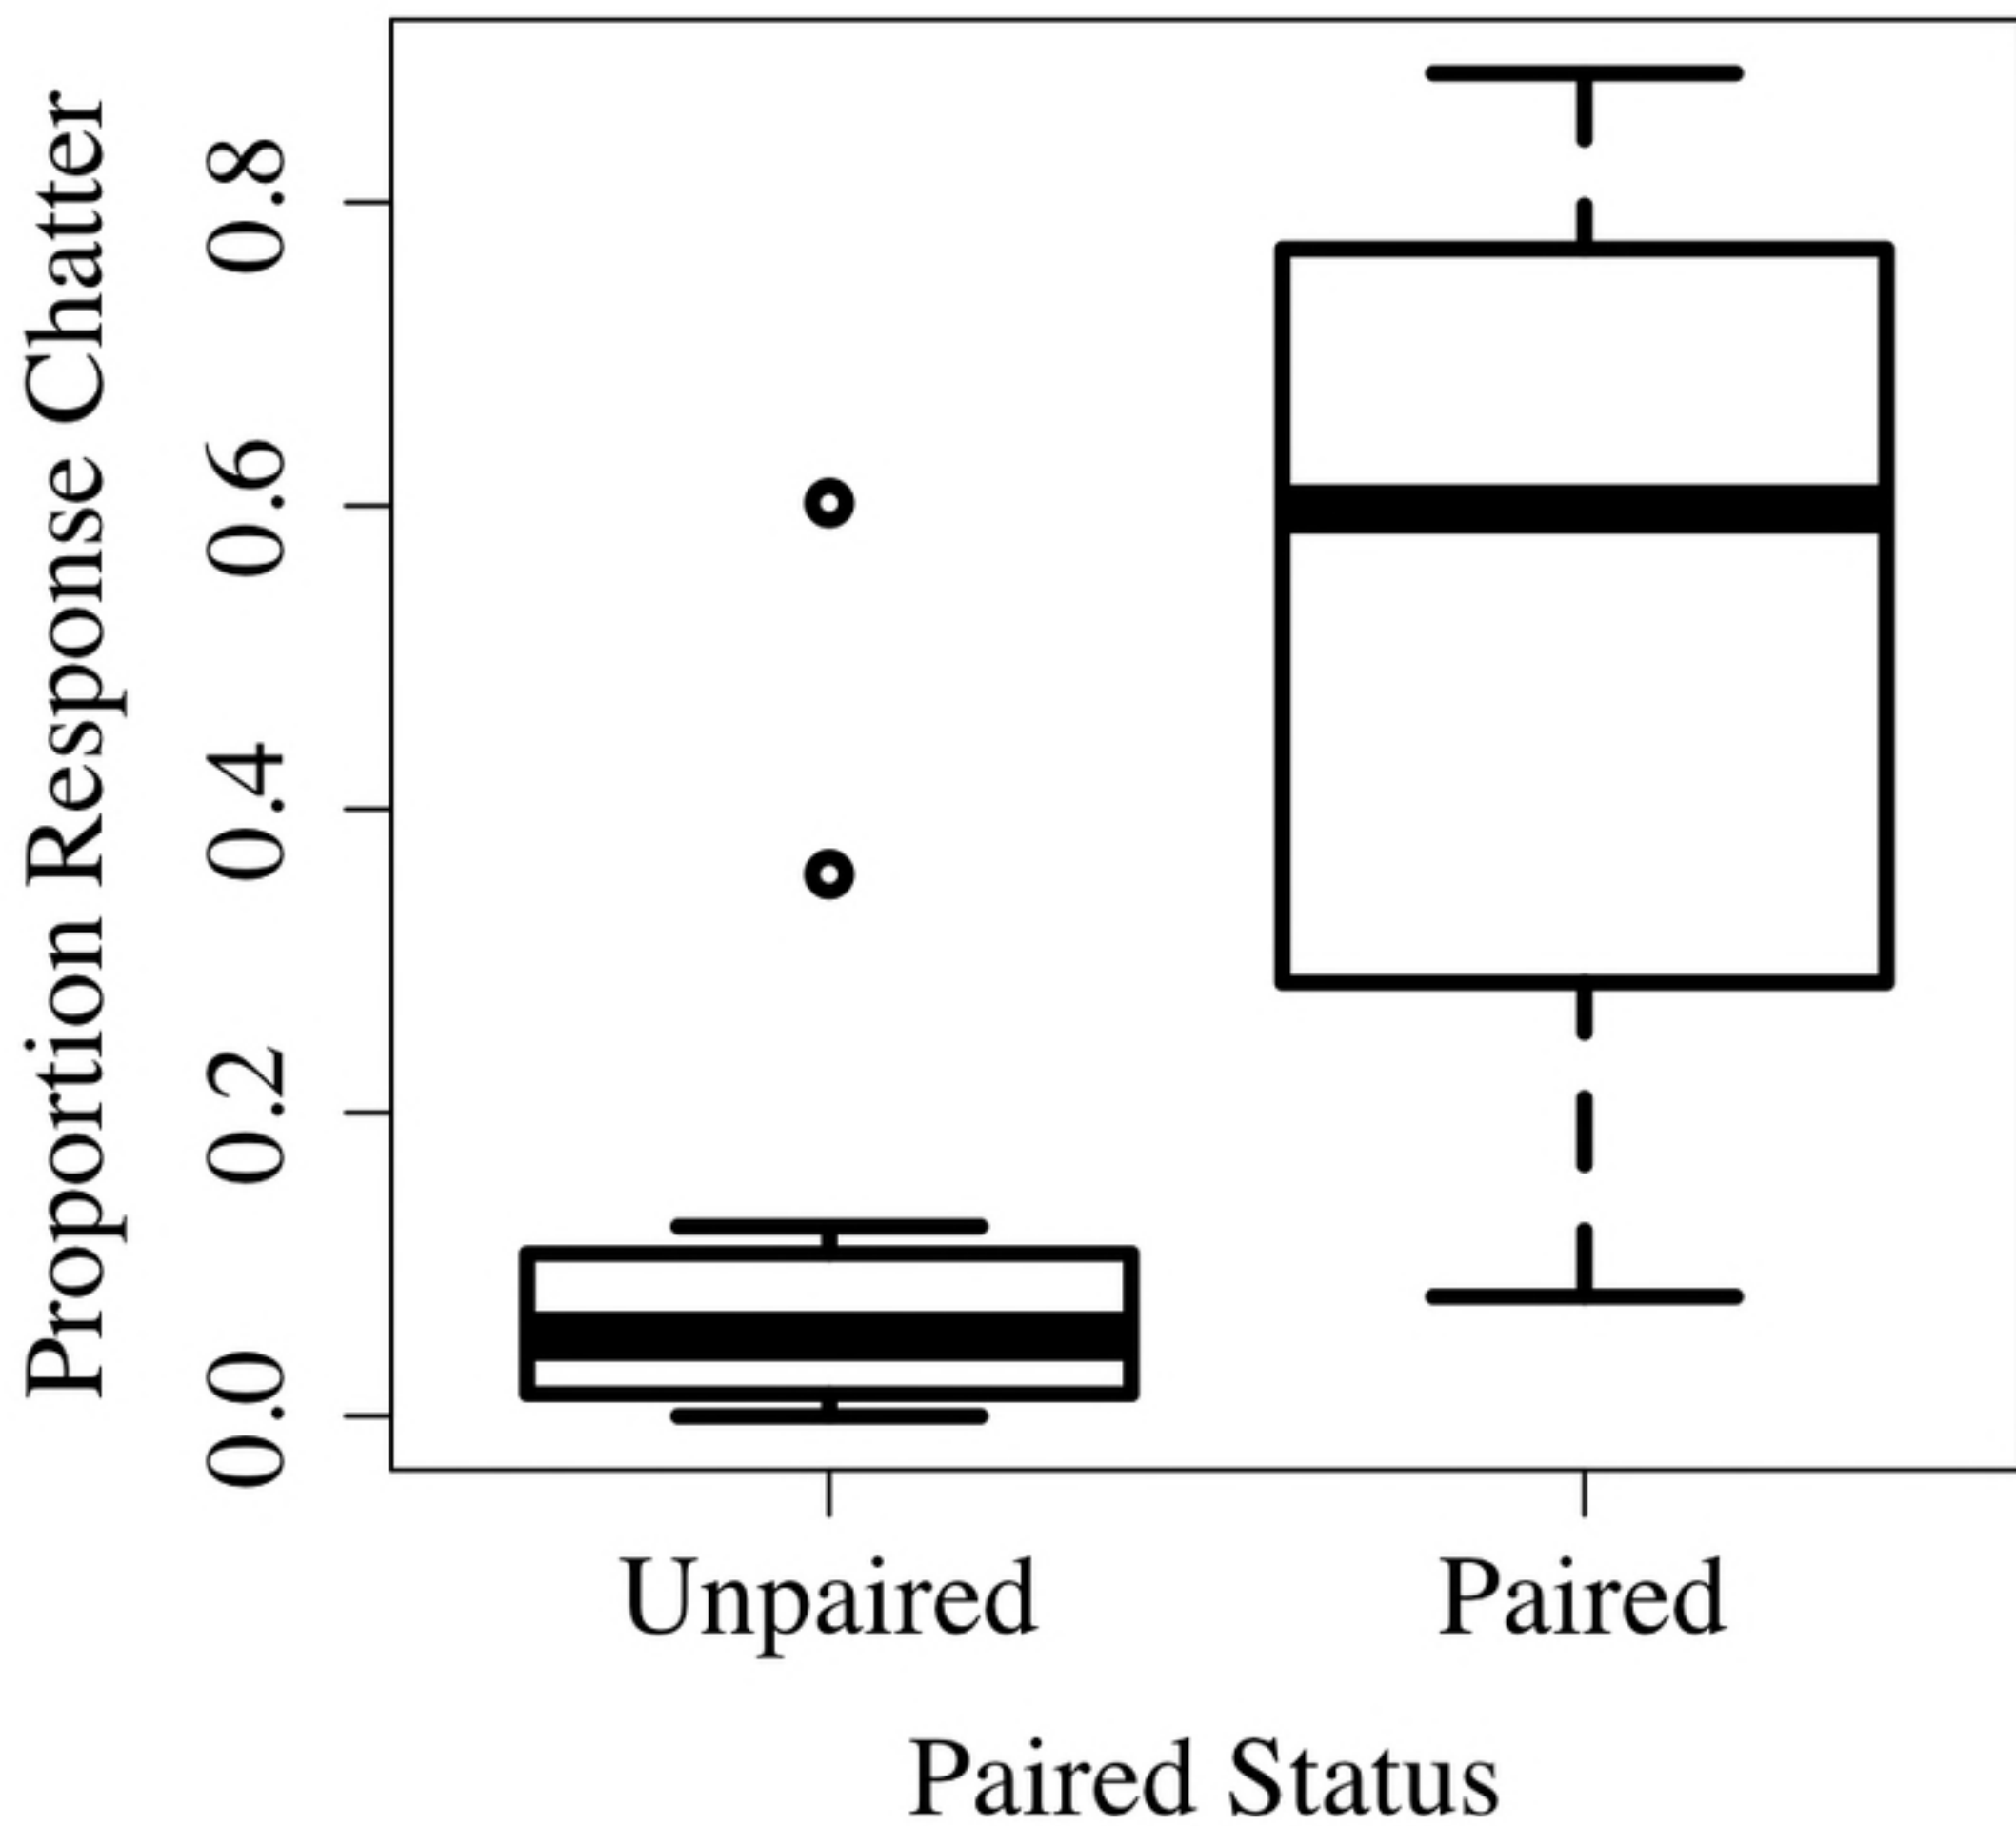

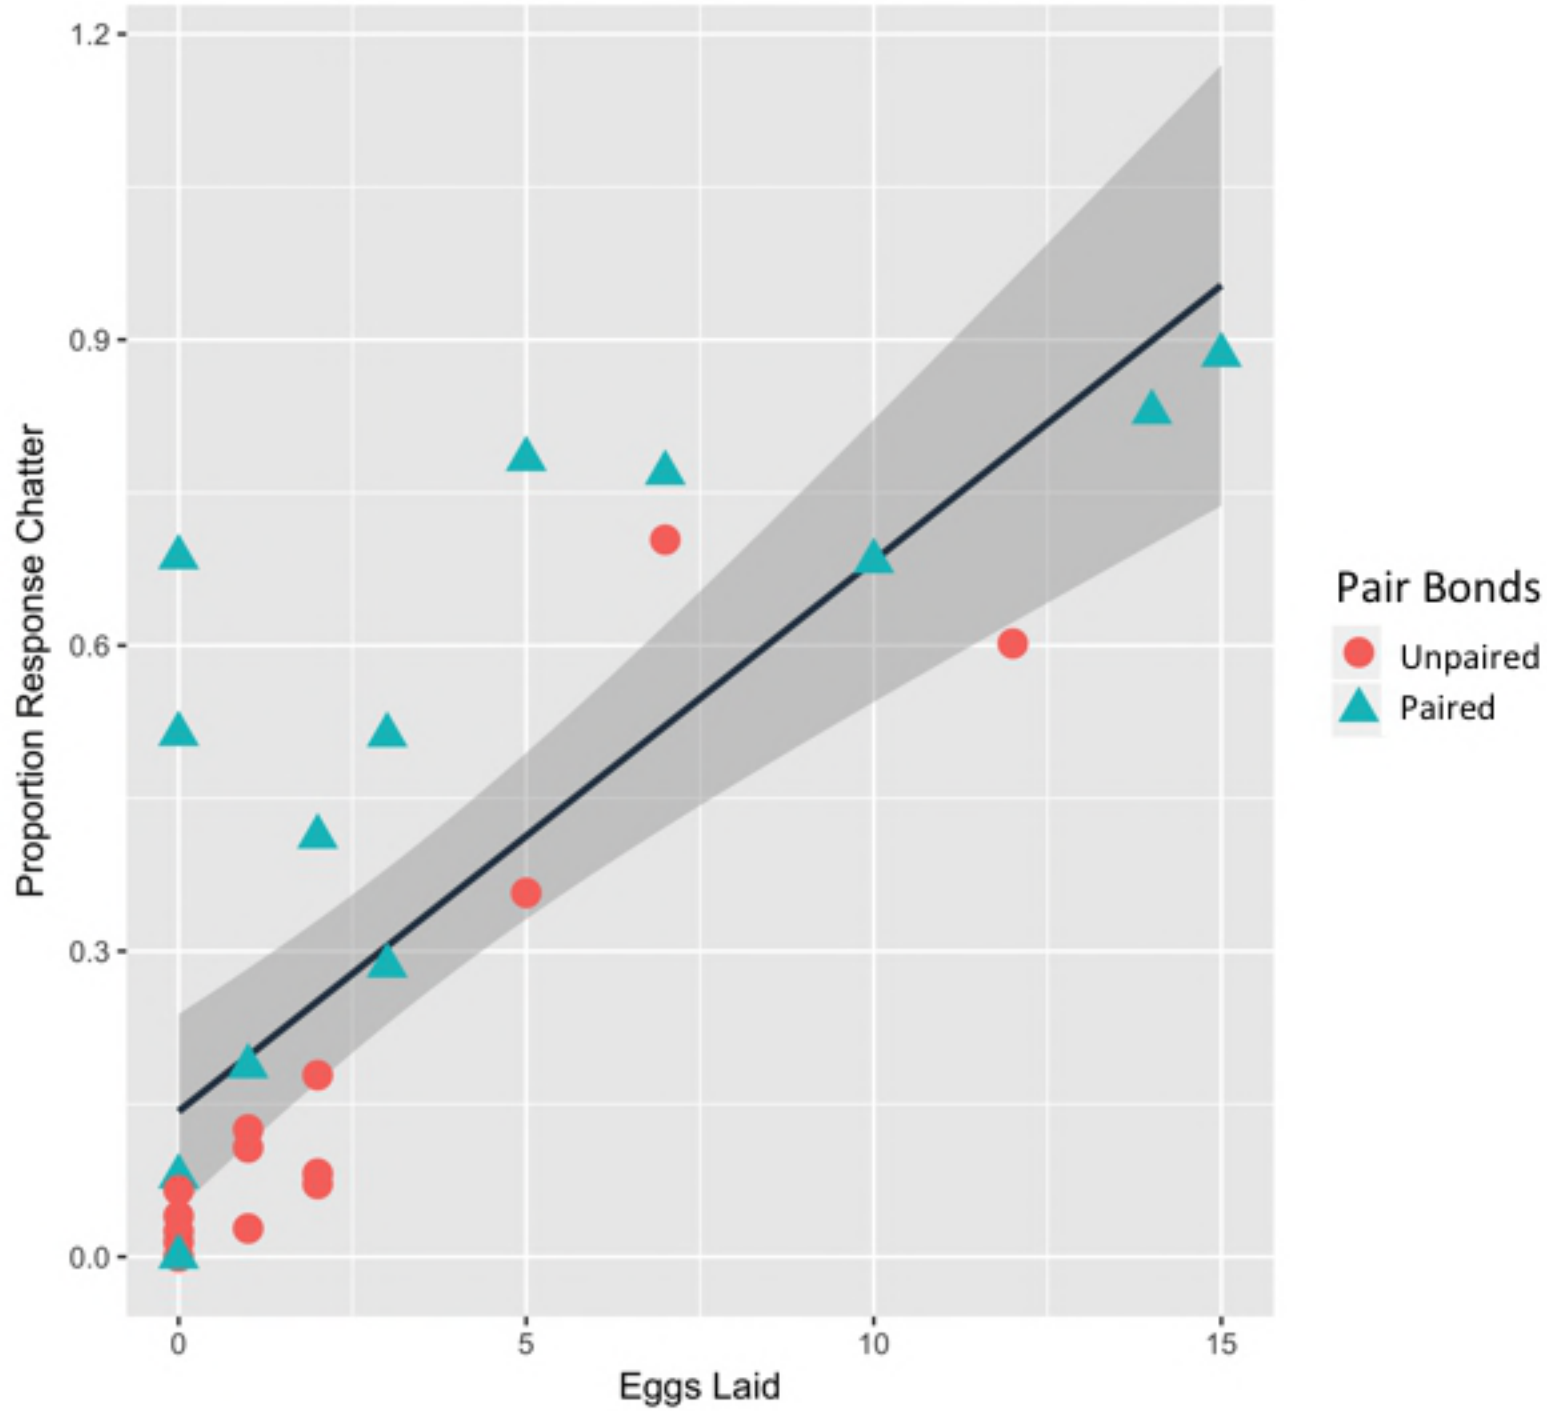

Source: https://www.biorxiv.org/content/10.1101/380642v1.full.pdf
